# Supplementary material for: Synthesis of polyurethanes with pendant azide groups attached on the soft segments and the surface modification with mPEG by click chemistry for antifouling applications
Source: Royal Society of Chemistry journal article supplement (doi:10.1039/c8ra02912a), 2018-01-01
Supplement: c8ra02912a1.pdf [file c8ra02912a1.pdf]

## Supporting Information

### Synthesis of polyurethanes with pendant azide groups attached on the soft segments and the surface modification with mPEG by click chemistry for antifouling applications

Fancui Meng, Zhuangzhuang Qiao, Yan Yao and Jianbin Luo\*

College of Chemistry and Environmental Protection Engineering, Southwest University for

Nationalities, 610041 Sichuan, China

Tel: +86 28 6902063. Fax: +86 28 6902063.

*E-mail addresses:* luojb1971@163.com

#### Supplemental Figures

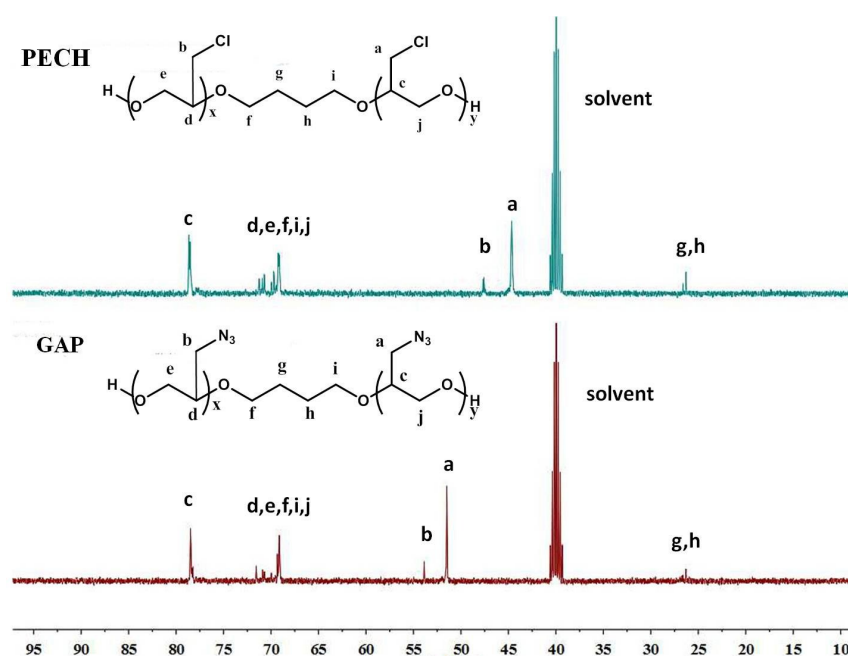

Fig. S1. The <sup>13</sup>C NMR of PECH and GAP.

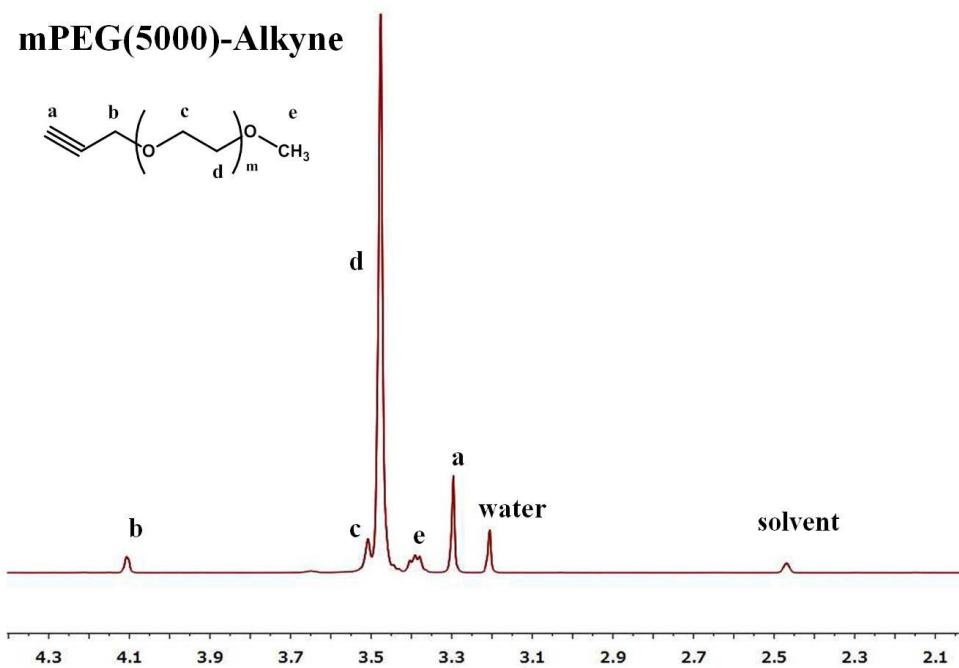

Fig. S2. The <sup>1</sup>H NMR of mPEG(5000)-Alkyne.
